# Supplementary material
Source: PubMed Central journal article supplement (PMC9491854)
Supplement: mmc1.pdf [file mmc1.pdf]

# THE LANCET

## Infectious Diseases

### Supplementary appendix 1

This translation in French was submitted by the authors and we reproduce it as supplied. It has not been peer reviewed. *The Lancet's* editorial processes have only been applied to the original in English, which should serve as reference for this manuscript.

Cette traduction en français a été proposée par les auteurs et nous l'avons reproduite telle quelle. Elle n'a pas été examinée par des pairs. Les processus éditoriaux du *Lancet* n'ont été appliqués qu'à l'original en anglais et c'est cette version qui doit servir de référence pour ce manuscrit.

Supplement to: Catho G, Sauser J, Coray V, et al. Impact of interactive computerised decision support for hospital antibiotic use (COMPASS): an open-label, cluster-randomised trial in three Swiss hospitals. *Lancet Infect Dis* 2022; published online July 20. [https://doi.org/10.1016/S1473-3099\(22\)00308-5](https://doi.org/10.1016/S1473-3099(22)00308-5).

**Contexte :** Les systèmes informatisés d'aide à la décision (CDSS) pour la prescription d'antibiotiques pourraient aider les médecins à prescrire des antibiotiques de manière plus appropriée. Cependant, des preuves solides de leur effet sur la quantité et la qualité de l'utilisation des antibiotiques restent rares. L'objectif de notre étude était d'évaluer si une aide à la décision informatisée pour la gestion des antibiotiques combinée à un retour d'information sur les indicateurs de prescription peut réduire les prescriptions d'antibiotiques pour les adultes admis à l'hôpital.

**Méthodes :** L'étude COMPASS (Computerised Antibiotic Stewardship Study) est un essai clinique de supériorité multicentrique, randomisé en grappes, à groupes parallèles et ouvert, visant à évaluer si une intervention informatisée multimodale de gestion des antibiotiques est efficace pour réduire l'utilisation des antibiotiques chez les adultes admis à l'hôpital. Après appariement, 24 services de trois hôpitaux suisses de soins tertiaires et secondaires ont été randomisés (1:1) pour l'intervention CDSS ou pour des mesures standard de bonne gestion des antibiotiques. L'intervention multimodale consistait en un CDSS fournissant un soutien pour le choix, la durée et la réévaluation du traitement antimicrobien, ainsi qu'un retour d'information sur la qualité de prescription d'antimicrobiens. Le critère de jugement principal était l'utilisation globale d'antibiotiques systémiques, mesurée en jours de traitement antibiotique par admission, à l'aide de modèles à effets mixtes négatifs-binomiaux ajustés. L'analyse a été effectuée en intention de traiter. L'étude a été enregistrée auprès de ClinicalTrials.gov (identifiant NCT03120975).

**Résultats :** 24 clusters (16 aux Hôpitaux universitaires de Genève et huit aux Hôpitaux régionaux du Tessin) ont été éligibles et assignés de manière aléatoire au contrôle ou à l'intervention entre le 1er octobre 2018 et le 31 décembre 2019. Globalement, 4578 (40.2%) des 11384 admissions ont reçu une antibiothérapie dans le groupe d'intervention et 4142 (42.8%) des 9673 dans le groupe de contrôle. La moyenne non ajustée des jours de traitement antibiotique par admission était légèrement inférieure dans le groupe d'intervention que dans le groupe témoin (3.2 jours de thérapie par admission, écart-type 6.2, vs 3.5 jours de thérapie par admission, écart-type 6-8 ;  $p < 0.0001$ ), et était similaire chez les patients recevant des antibiotiques (7.9 jours de thérapie par admission, écart-type 7.6, vs 8.1 jours de thérapie par admission, écart-type 8.4 ;  $p = 0.50$ ). Après ajustement des facteurs de confusion, il n'y avait pas de différence statistiquement significative entre les groupes pour la probabilité qu'une admission reçoive des antibiotiques (odds ratio [OR] pour l'intervention vs le contrôle 1-12, IC 95% 0-94-1-33). Pour les admissions avec exposition aux antibiotiques, les jours de thérapie par admission étaient également similaires (rapport des taux d'incidence 0.98, IC 95% 0.90-1.07). Dans l'ensemble, le CDSS a été utilisé au moins une fois pour 3466 (75.7%) des 4578 admissions avec prescription d'antibiotique, mais dès le premier jour de l'antibiothérapie pour seulement 1602 (58.9%) des 2721 admissions à Genève. Pour les admissions pour lesquelles le CDSS n'a pas été utilisé dès le premier jour, le délai moyen d'utilisation du CDSS était de 8.9 jours. D'après l'examen manuel de 1195 dossiers sélectionnés au hasard, le passage d'un traitement intraveineux à un traitement oral était significativement plus fréquent dans le groupe d'intervention après ajustement des facteurs de confusion (154 [76.6%] sur 201 contre 187 [87%] sur 215, +10.4% ; OR 1.9, 95% CI 1.1-3.3). Les consultations par des spécialistes en

maladies infectieuses étaient moins fréquentes dans le groupe d'intervention (388 [13.4%] sur 2889) que dans le groupe témoin (405 [16.9%] sur 2390 ; OR 0.84, 95% CI 0.59-1.25).

**Interprétation** : Une intervention informatisée multimodale de gestion des antibiotiques n'a pas réduit de manière significative l'utilisation globale des antibiotiques chez des adultes hospitalisés. Les facteurs contribuant à ce résultat ont probablement été une adhésion insuffisante, un environnement avec une consommation relativement faible d'antibiotiques au départ, et le délai entre l'admission dans le service et la première utilisation du CDSS.
