# Supplementary material
Source: PubMed Central journal article supplement (PMC9491854)
Supplement: mmc2.pdf [file mmc2.pdf]

# THE LANCET

## Infectious Diseases

### Supplementary appendix 2

This translation in Italian was submitted by the authors and we reproduce it as supplied. It has not been peer reviewed. *The Lancet's* editorial processes have only been applied to the original in English, which should serve as reference for this manuscript.

Questa traduzione in italiano è stata proposta dagli autori ed è riportata senza modifiche. Il testo tradotto in italiano non è stato sottoposto al processo di revisione paritaria. Il processo editoriale del *Lancet* è stato esclusivamente adottato per l'originale in inglese, che dovrebbe servire da riferimento per questo articolo.

Supplement to: Catho G, Sauser J, Coray V, et al. Impact of interactive computerised decision support for hospital antibiotic use (COMPASS): an open-label, cluster-randomised trial in three Swiss hospitals. *Lancet Infect Dis* 2022; published online July 20. [https://doi.org/10.1016/S1473-3099\(22\)00308-5](https://doi.org/10.1016/S1473-3099(22)00308-5).

## Contesto

I sistemi di supporto decisionale computerizzato (CDSS) sviluppati nell'ambito di strategie di stewardship contro l'antibiotico resistenza potrebbero portare a un miglioramento dell'appropriatezza delle prescrizioni di antibiotici da parte dei medici. Tuttavia, le prove di efficacia che questi strumenti incidano sulla qualità o quantità degli antibiotici usati sono scarse. Lo scopo del nostro studio era di valutare se un CDSS per la gestione antimicrobica combinato con un feedback sugli indicatori di prescrizione potesse ridurre le prescrizioni di antibiotici in pazienti adulti ospedalizzati.

## Metodi

Il Computerized Antibiotic Stewardship Study (COMPASS) è uno studio di superiorità multicentrico, randomizzato, a gruppi paralleli, in aperto. Mirava a valutare se un intervento multimodale di gestione degli antibiotici tramite CDSS è efficace nel ridurre l'uso di antibiotici per adulti ospedalizzati. Dopo l'appaiamento in coppie, 24 reparti di tre ospedali svizzeri di cure terziarie e secondarie sono stati randomizzati (1:1), utilizzando un generatore di sequenze casuali online, all'intervento CDSS o alla gestione standard degli antibiotici. L'intervento multimodale consisteva in un CDSS che forniva supporto per la scelta, la durata e la rivalutazione della terapia antimicrobica e un feedback sulla qualità della prescrizione antimicrobica. L'esito primario era l'uso sistemico complessivo di antibiotici, misurato in giorni di terapia per ricovero, calcolato utilizzando un modello binomiale negativo a effetti misti. L'analisi è stata eseguita per intenzione al trattamento e per protocollo. Lo studio è stato registrato su ClinicalTrials.gov (numero di serie NCT03120975).

## Risultati

24 cluster (16 presso gli Ospedali Universitari di Ginevra e otto presso gli Ospedali Regionali del Ticino) erano eligibili e sono stati assegnati in modo casuale al controllo o all'intervento tra il 1 ottobre 2018 e il 31 dicembre 2019. Complessivamente, 4578 (40,2%) su 11384 ricoveri hanno ricevuto una terapia antibiotica nel gruppo di intervento e 4142 (42,8%) su 9673 nel gruppo di controllo. La media di giorni complessivi di terapia per ricovero non aggiustata era leggermente inferiore nel gruppo di intervento rispetto al gruppo di controllo (3,2 giorni di terapia per ricovero, DS 6,2, vs 3,5 giorni di terapia per ricovero, DS 6,8;  $p < 0,0001$ ), ed era simile tra i pazienti che ricevevano antibiotici (7,9 giorni di terapia per ricovero, DS 7,6, vs 8,1 giorni di terapia per ricovero, DS 8,4;  $p = 0,50$ ). Dopo l'aggiustamento per i fattori confondenti, non vi era alcuna differenza statisticamente significativa tra i gruppi per quanto riguarda l'uso durante il ricovero di antibiotici (odds ratio [OR] per intervento vs controllo 1,12, IC 95% 0,94–1,33). Per i soli ricoveri con somministrazione di antibiotici, i giorni di terapia per ricovero erano anch'essi sovrapponibili (rapporto dei tassi di incidenza 0,98, IC 95% 0,90–1,07). Il CDSS è stato utilizzato almeno una volta in 3466 (75,7%) su 4578 ricoveri nei quali è stata effettuata almeno una prescrizione di antibiotici. Però il CDSS è stato usato il primo giorno di trattamento antibiotico solo in 1602 (58,9%) su 2721 ricoveri negli Ospedali di Ginevra. Per i pazienti per i quali il CDSS non è stato utilizzato dal primo giorno, il tempo medio per utilizzare il CDSS è stato di 8,9 giorni. Sulla base di una revisione manuale di 1195 cartelle cliniche selezionate casualmente, dopo l'aggiustamento per i fattori confondenti si è osservato che il passaggio dalla terapia endovenosa a quella orale era significativamente più frequente nel gruppo di intervento (154 [76,6%] su 201 vs 187 [87%] su 215, +10,4%; OR 1,9, IC 95% 1,1–3,3). Le visite da parte di specialisti in

malattie infettive erano meno frequenti nel gruppo di intervento (388 [13,4%] su 2889) rispetto al gruppo di controllo (405 [16,9%] su 2390; OR 0,84, IC 95% 0,59– 1,25).

### **Interpretazione**

Un intervento multimodale computerizzato di gestione degli antibiotici non ha ridotto significativamente l'uso complessivo di antibiotici, l'esito primario dello studio. I fattori che hanno contribuito sono probabilmente ascrivibili a un ridotto uso del CDSS, a un setting di cure con un uso di antibiotici relativamente basso e a un ritardo tra l'ammissione in reparto e il primo uso del CDSS.
